# Supplementary material for: The miR-26a/AP-2α/Nanog signaling axis mediates stem cell self-renewal and temozolomide resistance in glioma
Source: PubMed Central journal article supplement (PMC6735392; doi:10.7150/thno.33800), 2019-07-28
Supplement: thnov09p5497s1.pdf [file thnov09p5497s1.pdf]

## Supplementary Materials

Table S1 Primer pairs in this study

| Name                             | Sequence (5'- to -3')                                   | Purpose  |
|----------------------------------|---------------------------------------------------------|----------|
| AP-2 $\alpha$ -F                 | AGGTCAATCTCCCTACACGAG                                   |          |
| AP-2 $\alpha$ -R                 | GGAGTAAGGATCTTGC GACTGG                                 | RT-PCR   |
| AP-2 $\alpha$ 3'UTR545-551 mut-F | TGAATAAATGCTAACACAAATAC                                 |          |
| AP-2 $\alpha$ 3'UTR545-551 mut-R | GTATTTGTGTTAGCATTTATTCA                                 | PCR      |
| AP-2 $\alpha$ 3'UTR622-628 mut-F | AGCGACCAATGCTAACTTTCTC                                  |          |
| AP-2 $\alpha$ 3'UTR622-628 mut-R | GAGAAAGTTAGCATTGGTCGCT                                  | PCR      |
| BCL2-F                           | GGTGGGGTCATGTGTGTGG                                     |          |
| BCL2-R                           | CGGTTTCAGGTA CT CAGTCATCC                               | RT-PCR   |
| CD133-F                          | AGTCGGAAACTGGCAGATAGC                                   |          |
| CD133-R                          | GGTAGTGT TGTACTGGGCCAAT                                 | RT-PCR   |
| GFAP-F                           | AGGTCCATGTGGAGCTTGAC                                    |          |
| GFAP-R                           | GCCATTGCCTCATACTGCGT                                    | RT-PCR   |
| GST- $\pi$ -F                    | CCCTACACCGTGGTCTATTTC                                   |          |
| GST- $\pi$ -R                    | CAGGAGGCTTTGAGTGAGC                                     | RT-PCR   |
| IL6-F                            | CCTGAACCTTCCAAAGATGGC                                   |          |
| IL6-R                            | TTCACCAGGCAAGTCTCCTC                                    | RT-PCR   |
| IL10-F                           | TCAAGGCGCATGTGAACTCC                                    |          |
| IL10-R                           | GATGTCAA ACTCACTCATGGCT                                 | RT-PCR   |
| JAK2-F                           | AGCCTATCGGCATGGAATATCT                                  |          |
| JAK2-R                           | TAACACTGCCATCCCAAGACA                                   | RT-PCR   |
| Klf4-F                           | CGGACATCAACGACGTGAG                                     |          |
| Klf4-R                           | GACGCCTTCAGCACGAACT                                     | RT-PCR   |
| MCL1-F                           | TGCTTCGGAAACTGGACATCA                                   |          |
| MCL1-R                           | TAGCCACAAAGGCACCAAAAG                                   | RT-PCR   |
| MDR-1-F                          | GGGATGGTCAGTGTGATGGA                                    |          |
| MDR-1-R                          | GCTATCGTGGTGGCAAACAATA                                  | RT-PCR   |
| MGMT-F                           | ACCGTTTGC GACTTGGTACTT                                  |          |
| MGMT-R                           | GGAGCTTTATTTTCGTGCAGACC                                 | RT-PCR   |
| miR-26a                          | GTCGTATCCAGTGCAGGGTCCGAGGTATTTCGCACTGGAT<br>ACGACAGCCTA | RT       |
| miR-26a-F                        | GCGCTTCAAGTAATCCAG                                      |          |
| miR-26a-R                        | TATCCAGTGCAGGGTCC                                       | RT-PCR   |
| Mrp-F                            | CTCTATCTCTCCC GACATGACC                                 |          |
| Mrp-R                            | AGCAGACGATCCACAGCAAAA                                   | RT-PCR   |
| Nanog-F                          | CCCCAGCCTTTACTCTTCCTA                                   |          |
| Nanog-R                          | CCAGGTTGAATTGTTCCAGGTC                                  | RT-PCR   |
| Nanog(-741/+18)-F                | CGG GGTACC ATCGGCTCACCACAACCTCT                         |          |
| Nanog(-741/+18)-R                | CCC AAGCTT AGCTGGATCCACACTCATGT                         | promoter |
| Nanog(-741/+18)-516 mut F        | TGGGCCACCAAGCCCATACTTTTCTTA                             |          |
| Nanog(-741/+18)-516mut R         | TAAGAAAAAGTATGGGCTTGGTGGCCCA                            | PCR      |
| Nanog(-741/+18)-560 mut F        | TGATCCGCTATTACGTCATCCCAATTTA                            |          |

|                          |                                                                                             |        |
|--------------------------|---------------------------------------------------------------------------------------------|--------|
| Nanog(-741/+18)-560mut R | TAAATTGGGATGACGTAATAGGCGGATCA                                                               | PCR    |
| Nanog(-568/-544)-F       | GATCCGCCTGCCACGGCCTCCCAAT                                                                   |        |
| Nanog(-568/-544)-R       | ATTGGGAGGCCGTGGCAGGCGGATC                                                                   | EMSA   |
| Nanog (-527/-503)-F      | GGTGGGCCACCGCGCCCGCCTTTT                                                                    |        |
| Nanog(-527/-503)-R       | AAAAGGCCGGGCGCGGTGGCCCACC                                                                   | EMSA   |
| Nanog(-568/-544)mut-F    | GATCCGCCTATTACGTCATCCCAAT                                                                   |        |
| Nanog(-568/-544)mut-R    | ATTGGGATGACGTAATAGGCGGATC                                                                   | EMSA   |
| Nanog(-527/-503)mut-F    | GGTGGGCCACCAAGCCATACTTTT                                                                    |        |
| Nanog(-527/-503)mut-R    | AAAAGTATGGGCTTGGTGGCCCACC                                                                   | EMSA   |
| Nestin-F                 | CTGCTACCCTTGAGACACCTG                                                                       |        |
| Nestin-R                 | GGGCTCTGATCTCTGCATCTAC                                                                      | RT-PCR |
| PD-L1-F                  | TGGCATTGCTGAACGCATTT                                                                        |        |
| PD-L1-R                  | TGCAGCCAGGTCTAATTGTTTT                                                                      | RT-PCR |
| pmir GLO-F               | GTGGTGTGTGTTTCGTGGAC                                                                        |        |
| pmir GLO-R               | TCACTGCATTCTAGTTGTGGTTT                                                                     | PCR    |
| Sox2-F                   | TACAGCATGTCCTACTCGCAG                                                                       |        |
| Sox2-R                   | GAGGAAGAGGTAACCACAGGG                                                                       | RT-PCR |
| STAT5A-F                 | GCAGAGTCCGTGACAGAGG                                                                         |        |
| STAT5A-R                 | CCACAGGTAGGGACAGAGTC                                                                        | RT-PCR |
| Survivin-F               | AGGACCACCGCATCTCTACAT                                                                       |        |
| Survivin-R               | AAGTCTGGCTCGTTCTCAGTG                                                                       | RT-PCR |
| TopoIIa-F                | TGGCTGTGGTATTGTAGAAAGC                                                                      |        |
| TopoIIa-R                | TTGGCATCATCGAGTTTGGGA                                                                       | RT-PCR |
| miR-26a                  | GGCUGUGGCUGGAUUAAGUAAUCCAGGAUAGGCUGUU<br>UCCAUCUGUGAGGCCUAUUCUUGAUUACUUGUUUCUGG<br>AGGCAGCU | clone  |
| miR-26a inhibitor        | ccggAGCCTATCCTGGATTACTTGAATTTTg                                                             | clone  |

Table S2 Nanog expression and clinical characteristics

| Clinical features      | Number | Overexpression | Low expression | P value            |
|------------------------|--------|----------------|----------------|--------------------|
| Total number           | 86     |                |                |                    |
| Gender                 |        |                |                | 0.7076             |
| Female                 | 26     | 17             | 9              |                    |
| Male                   | 49     | 30             | 19             |                    |
| Age (median, 39 years) |        |                |                | 0.4344             |
| <                      | 32     | 21             | 11             |                    |
| ≥                      | 43     | 26             | 17             |                    |
| Histological diagnosis |        |                |                | <b>0.0002</b>      |
| Astrocytoma            | 28     | 11             | 17             |                    |
| Glioblastoma           | 47     | 36             | 11             |                    |
| Histological grade     |        |                |                | <b>&lt; 0.0001</b> |
| Grade I/II             | 23     | 7              | 16             |                    |
| Grade III/IV           | 52     | 40             | 12             |                    |
| Normal tissue          | 11     |                |                |                    |

Table S3 Sox2 expression and clinical characteristics

| <b>Clinical features</b> | <b>Number</b> | <b>Overexpression</b> | <b>Low expression</b> | <b>P value</b>     |
|--------------------------|---------------|-----------------------|-----------------------|--------------------|
| Total number             | 86            |                       |                       |                    |
| Gender                   |               |                       |                       | 0.7956             |
| Female                   | 26            | 17                    | 9                     |                    |
| Male                     | 49            | 32                    | 17                    |                    |
| Age (median, 39 years)   |               |                       |                       | 0.1655             |
| <                        | 32            | 17                    | 15                    |                    |
| ≥                        | 43            | 32                    | 11                    |                    |
| Histological diagnosis   |               |                       |                       | <b>&lt; 0.0001</b> |
| Astrocytoma              | 28            | 10                    | 18                    |                    |
| Glioblastoma             | 47            | 39                    | 8                     |                    |
| Histological grade       |               |                       |                       | <b>&lt; 0.0001</b> |
| Grade I/II               | 23            | 7                     | 16                    |                    |
| Grade III/IV             | 52            | 42                    | 10                    |                    |
| Normal tissue            | 11            |                       |                       |                    |

Table S4 CD133 expression and clinical characteristics

| Clinical features      | Number | Overexpression | Low expression | P value       |
|------------------------|--------|----------------|----------------|---------------|
| Total number           | 86     |                |                |               |
| Gender                 |        |                |                | 0.8725        |
| Female                 | 26     | 11             | 15             |               |
| Male                   | 49     | 26             | 23             |               |
| Age (median, 39 years) |        |                |                | 0.5924        |
| <                      | 32     | 16             | 16             |               |
| ≥                      | 43     | 21             | 22             |               |
| Histological diagnosis |        |                |                | <b>0.0124</b> |
| Astrocytoma            | 28     | 10             | 18             |               |
| Glioblastoma           | 47     | 27             | 20             |               |
| Histological grade     |        |                |                | <b>0.0011</b> |
| Grade I/II             | 23     | 6              | 17             |               |
| Grade III/IV           | 52     | 31             | 21             |               |
| Normal tissue          | 11     |                |                |               |

Table S5 Correlation between AP-2 $\alpha$  expression and Sox2 expression in glioma samples by IHC analysis.

| AP-2 $\alpha$ expression | Cases | Sox2 expression |              | P value*          |
|--------------------------|-------|-----------------|--------------|-------------------|
|                          |       | Low, No (%)     | High, No (%) |                   |
| Low ( $\leq 30\%$ )      | 50    | 11 (22.0%)      | 39 (78.0%)   |                   |
| High ( $> 30\%$ )        | 36    | 25 (69.4%)      | 11 (30.5%)   | <b>&lt; 0.001</b> |
| Total                    | 86    | 36 (41.9%)      | 50 (58.1%)   |                   |

All 86 samples were divided according to the proportion score to define AP-2 $\alpha$  or Sox2 expression with low or high staining.

\*Fisher's exact test.

Table S6 Correlation between AP-2 $\alpha$  expression and CD133 expression in glioma samples by IHC analysis.

| AP-2 $\alpha$ expression | Cases | CD133 expression |              | P value*          |
|--------------------------|-------|------------------|--------------|-------------------|
|                          |       | Low, No (%)      | High, No (%) |                   |
| Low ( $\leq 30\%$ )      | 50    | 21 (42.0%)       | 29 (58.0%)   |                   |
| High ( $> 30\%$ )        | 36    | 28 (77.8%)       | 8 (22.2%)    | <b>&lt; 0.001</b> |
| Total                    | 86    | 49 (56.9%)       | 37 (43.0%)   |                   |

All 86 samples were divided according to the proportion score to define AP-2 $\alpha$  or CD133 expression with low or high staining.

\*Fisher's exact test.

Table S7 Correlation between AP-2 $\alpha$  expression and p-STAT3 expression in glioma samples by IHC analysis.

| AP-2 $\alpha$ expression | Cases | p-STAT3 expression |            | P value*          |
|--------------------------|-------|--------------------|------------|-------------------|
|                          |       | -, No (%)          | +, No (%)  |                   |
| Low ( $\leq 30\%$ )      | 50    | 16 (32.0%)         | 34 (68.0%) |                   |
| High ( $> 30\%$ )        | 36    | 20 (55.5%)         | 16 (44.4%) | <b>&lt; 0.001</b> |
| Total                    | 86    | 49 (56.9%)         | 37 (43.0%) |                   |

All 86 samples were divided according to the proportion score to define AP-2 $\alpha$  with low or high staining and p-STAT3 with or without staining.

\*Fisher's exact test.



Figure S1

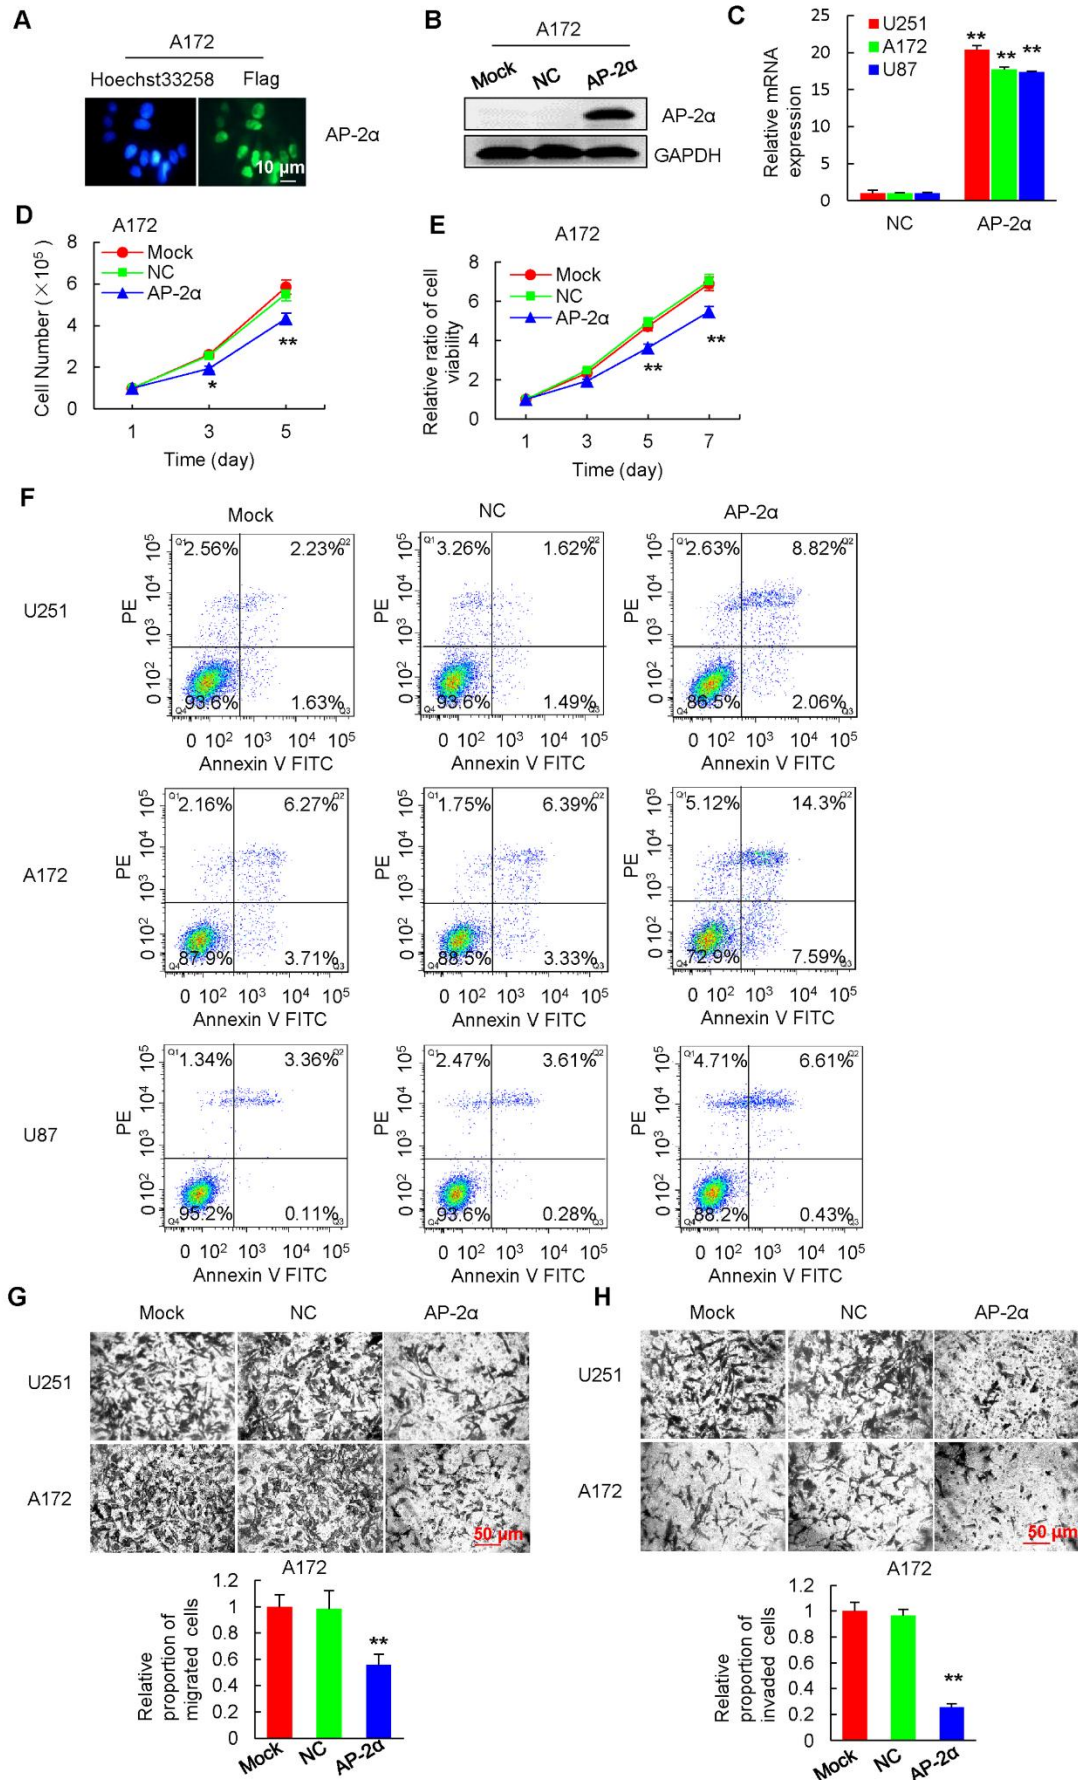

Figure S1. Effects of AP-2 $\alpha$  overexpression on glioma cell growth *in vitro*. (A) Immunofluorescence staining of Flag-AP-2 $\alpha$  overexpression in lentiviral-infected A172 cells. (B) Western blots of Flag-AP-2 $\alpha$  expression in A172 cells. GAPDH was served as a loading control. (C) qRT-PCR analysis of AP-2 $\alpha$  expression in lentiviral-infected glioma cells. (D) Cell survival assays of lentiviral-infected A172 cells. (E) MTT assays of lentiviral-infected and parental A172 cells. Stable cells (5,000) were plated in octuplicate in 48-well plates and grown in DMEM with 10% FBS. The absorbance was analyzed for 1, 3, 5 and 7 days. (F) Cell apoptosis assays were evaluated using flow cytometry in the control and AP-2 $\alpha$ -infected glioma cells. (G) Effect of AP-2 $\alpha$  overexpression on glioma cell migration by transwell assays. Examples of migrated cells and the relative invasion proportion of A172 cells are shown. (H) Effect of AP-2 $\alpha$  overexpression on glioma cell invasion through Matrigel. Examples of invaded cells and the relative invasion proportion of A172 cells are shown. \*, p<0.05, \*\*, p<0.01.

Figure S2

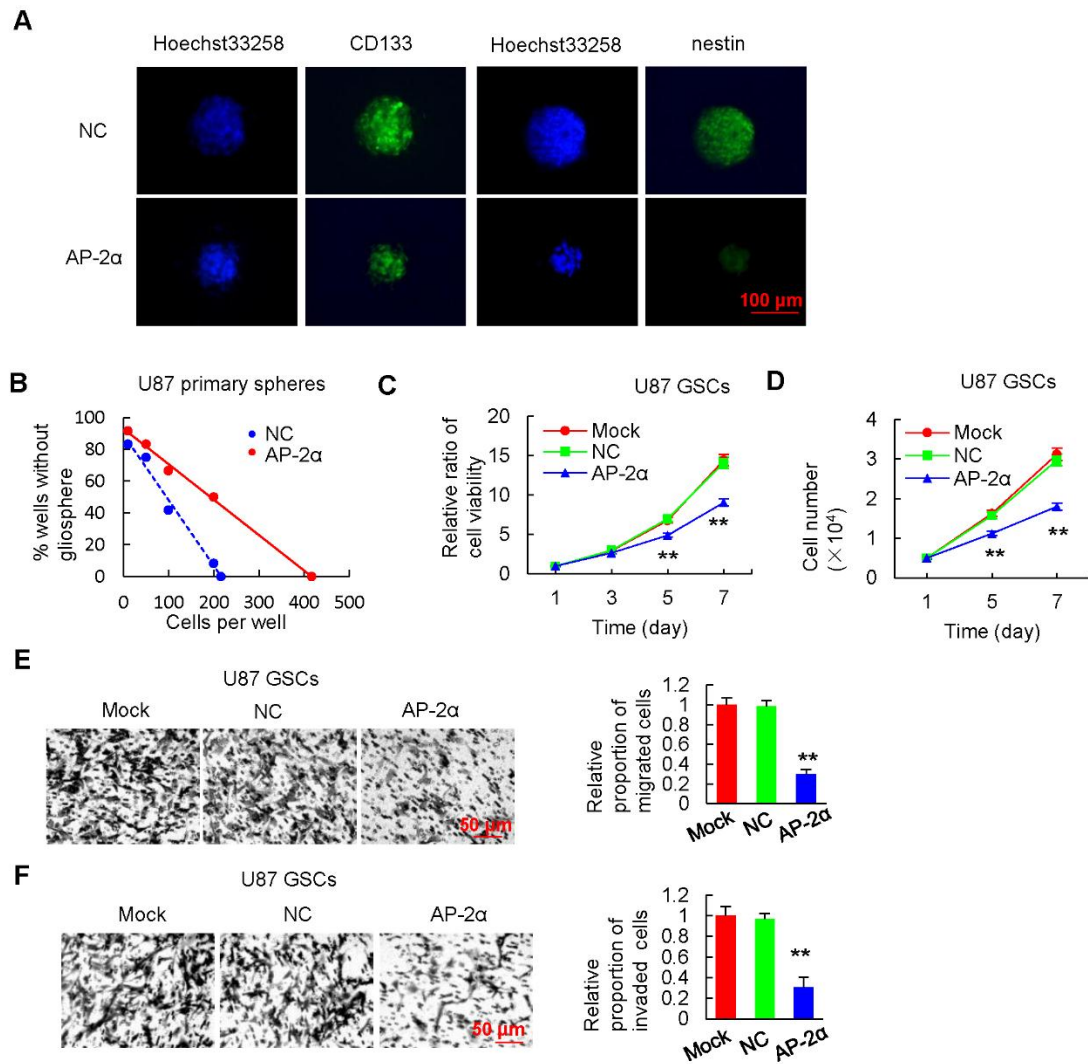

Figure S2. Effects of AP-2 $\alpha$  overexpression on glioma stem cells *in vitro*. (A) Immunofluorescence staining showed the expression of stem marker genes CD133 and nestin in U251 GSCs. (B) A limiting dilution assay was performed to measure tumor sphere formation. Cells were plated at 200, 100, 50, 20, 10, or 5 cells/well and cultured in stem cell-conditioned medium ( $n = 48$  wells/condition,  $p = 0.049$ ). (C) MTT assays of lentiviral-infected and parental U87 GSCs. Stable cells (5,000) were plated in octuplicate in 48-well plates and grown in stem cell-conditioned medium. The absorbance was analyzed for 1, 3, 5 and 7 days. (D) Cell survival assays of lentiviral-infected and parental U87 GSCs. Stable cells (100,000) were plated into 6-well plates in triplicate, grown in stem cell-conditioned medium for 7 days, cell numbers were

counted with a hemocytometer. (E) Effect of AP-2 $\alpha$  overexpression on U87 GSC migration by transwell assays. Examples of cells migrated through the PET-membrane and relative migration proportion of cells are shown. (F) Effect of AP-2 $\alpha$  overexpression on U87 GSC invasion through Matrigel. Examples of cells migrated through Matrigel-coated Transwell and relative invasion proportion of cells are shown.

**\*\***,  $p < 0.01$ .

Figure S3

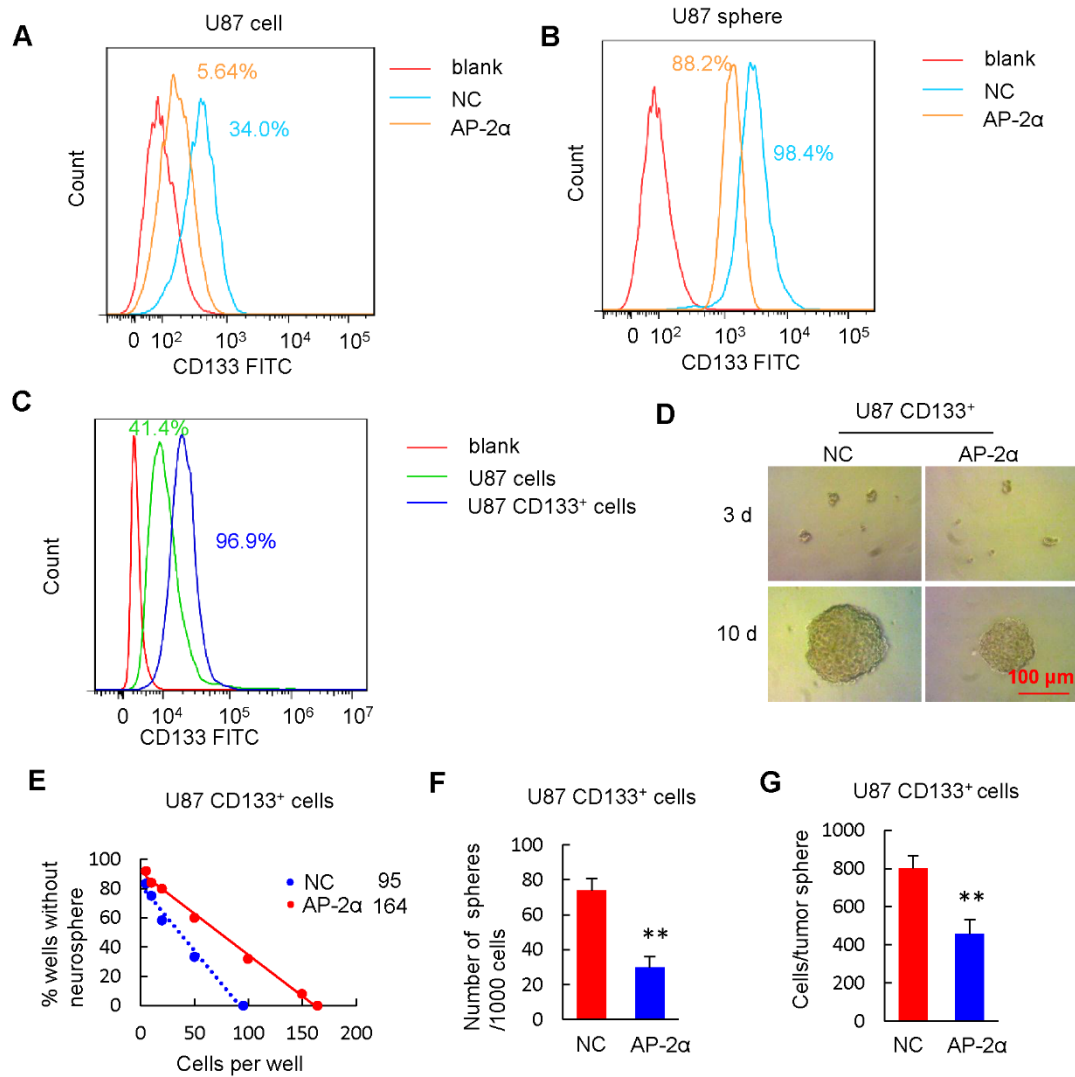

Figure S3. Effects of AP-2 $\alpha$  overexpression on U87 CD133<sup>+</sup> stem cells *in vitro*. (A) CD133 positive cells were detected in U87 cells by FACS analysis. The characteristic patterns of blank (anti-IgG FITC), NC and AP-2 $\alpha$  groups (anti-CD133 FITC). (B) CD133 positive cells were detected using anti-CD133 FITC antibodies in U87 sphere cells by FACS analysis. (C) CD133 positive cells were sorted by magnetic beads and measured by FACS analysis. (D) Representative images of CD133<sup>+</sup> U87 spheroid cells were shown. (E) A limiting dilution assay was performed to measure CD133<sup>+</sup> tumor sphere formation. Cells were plated at 200, 100, 50, 20, 10, or 5 cells/well and cultured in stem cell-conditioned medium (n = 48 wells/condition, p = 0.036). (F) Evaluation of the number of CD133<sup>+</sup> spheres from 1000 cells on day 9. (G) Quantification of cell numbers per CD133<sup>+</sup> U87 spheroid. \*\*, p < 0.01.

Figure S4

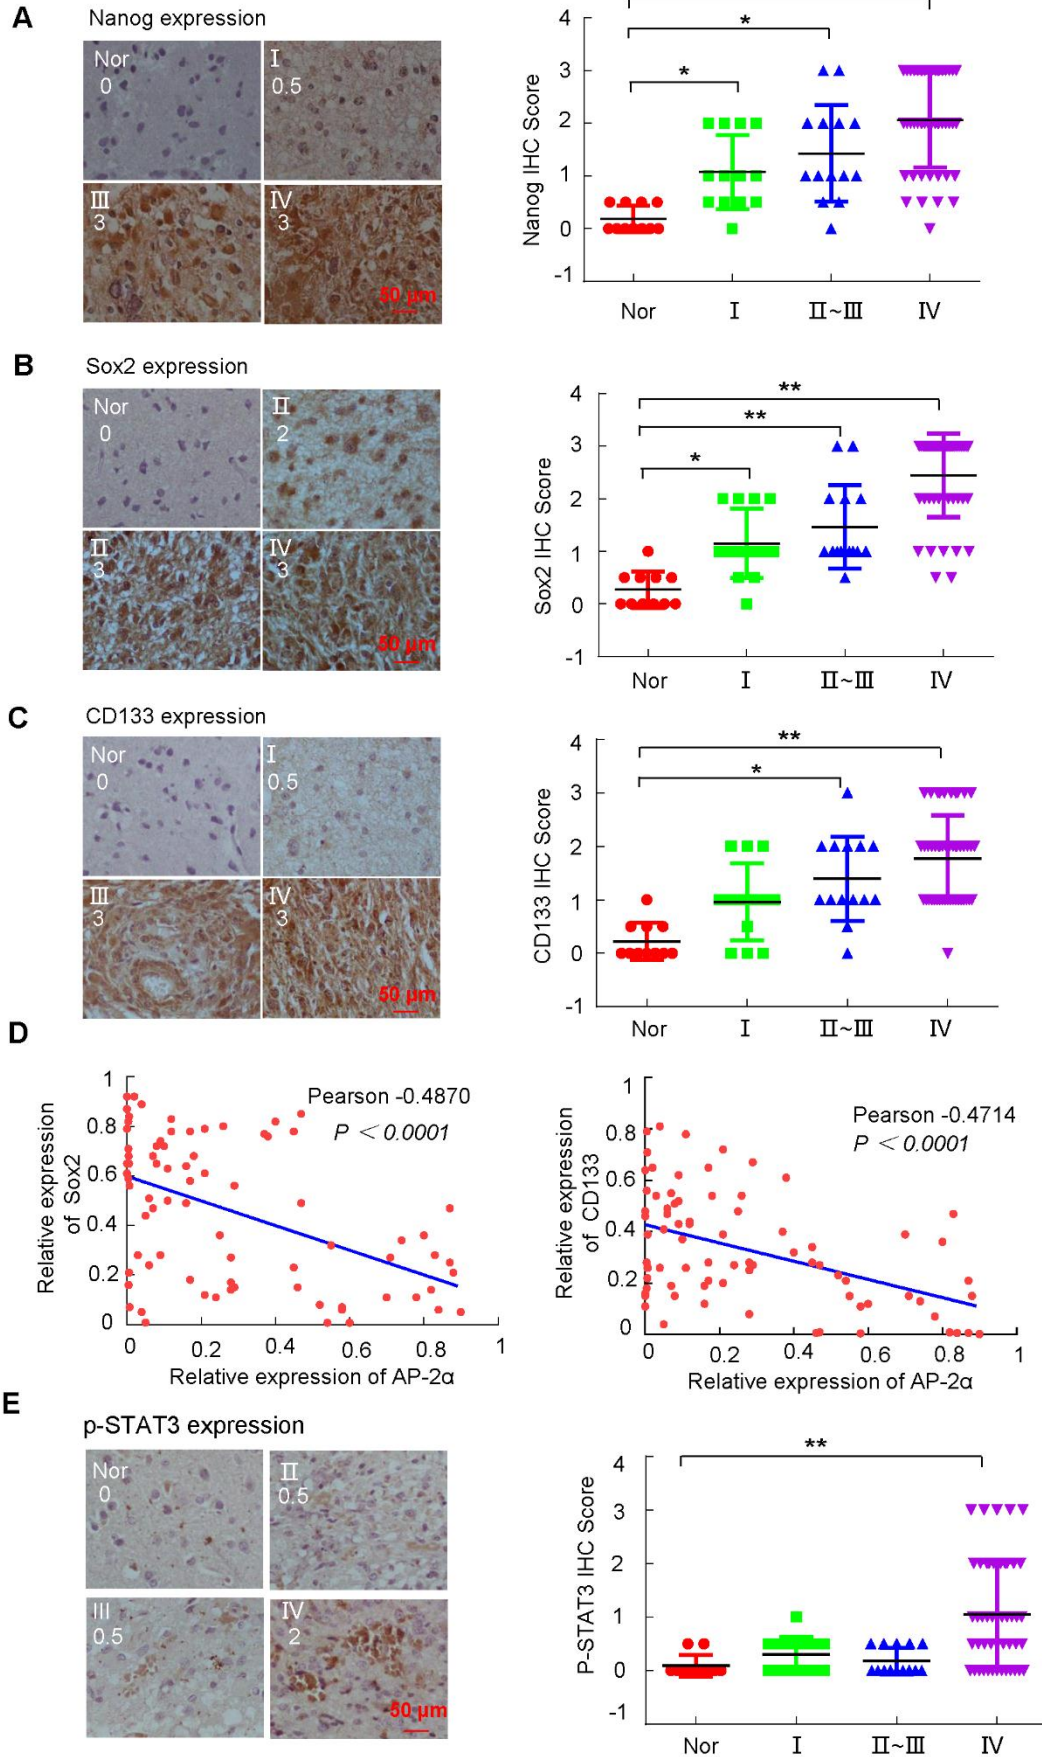

Figure S4. The expression of AP-2 $\alpha$  downstream genes in glioma tissues. Nanog expression (A), Sox2 expression (B) and CD133 expression (C) was examined by immunohistochemical analysis in 75 glioma and 11 adjacent normal tissues. Immunohistochemical scores of glioma and normal tissues stained with antibodies against anti-Nanog, anti-Sox2 and anti-CD133 were shown. (D) The correlation between AP-2 $\alpha$  and Sox2 expression or AP-2 $\alpha$  and CD133 expression was analyzed using GraphPad Prism. The staining intensity was scored with the proportion of positive cells. (E) The p-STAT3 expression was examined by immunohistochemical analysis in glioma tissues. Immunohistochemical scores of p-STAT3 staining were shown. \*, p<0.05, \*\*, p<0.01.
